# Supplementary material for: Machine learning-aided catalyst screening and multi-objective optimization for the indirect CO2 hydrogenation to methanol and ethylene glycol process
Source: Royal Society of Chemistry journal article supplement (doi:10.1039/d3gc01865b), 2023-01-01
Supplement: d3gc01865b1.pdf [file d3gc01865b1.pdf]

+ Supporting Information

## **Machine learning-aided catalysts screening and multi-objective optimization for the indirect CO<sub>2</sub> hydrogenation to methanol and ethylene glycol process**

Qingchun Yang<sup>a, b\*</sup>, Yingjie Fan <sup>a</sup>, Jianlong Zhou <sup>a</sup>, Lei Zhao <sup>a</sup>, Yichun Dong <sup>a</sup>,  
Jianhua Yu<sup>c</sup>, Dawei Zhang <sup>a\*\*</sup>

<sup>a</sup> School of Chemistry and Chemical Engineering, Hefei University of Technology, Hefei, PR China, 230009

<sup>b</sup> Anhui HaoYuan Chemical Group Co., Ltd., Fuyang, PR China, 236023

<sup>c</sup> State Grid Anhui Electric Power Co., Ltd., Guangde Power Supply Company, Guangde, PR China, 242200

+ For publication in *Green Chemistry*

### **\*Corresponding author:**

Dr. Qingchun Yang

Email: [ceqcyang@hfut.edu.cn](mailto:ceqcyang@hfut.edu.cn)

### **\*\*Corresponding author:**

Prof. Dawei Zhang

Email: [zhangdw@utsc.edu.cn](mailto:zhangdw@utsc.edu.cn)

Total number of pages: 17 (S1-S17)

Total number of figures: 7 (Figures S1-S7)

Total number of tables: 6 (Tables S1-S6)

## Appendix A Supplementary material of the machine learning models

### A.1 Random forest regression algorithm

Random forest algorithm, one of the representative Bagging integration algorithms, further introduces random feature selection in each round of decision tree training process by taking decision tree as the base learner. The random forest regression model

The algorithm principle of the random forest algorithm is as follows:

(1) The  $S$  sample points are randomly selected from the training sample set  $M$  to obtain a series of new  $M_1, \dots, M_s$  sub training sets.

(2) Each regression tree is trained through the sub training set. The segmentation rule of each node of each tree is to select  $k$  features randomly from all the features. Then the optimal segmentation point  $(j, s)$  is selected from the  $k$  features according to the minimization of square error  $L(j, s)_{\min}$ , and divided in to left sub trees  $(R_1(j, s))$  and right sub trees  $(R_2(j, s))$ , as shown in Eqs. (S1) - (S4).

$$L(j, s) = \sum_{x_i \in R_1(j, s)} (y_i - \hat{c}_1)^2 + \sum_{x_i \in R_2(j, s)} (y_i - \hat{c}_2)^2 \quad (\text{S1})$$

$$R_1(j, s) = \{x | x^{(j)} \leq s\} \quad (\text{S2})$$

$$R_2(j, s) = \{x | x^{(j)} > s\} \quad (\text{S3})$$

$$\hat{C}_m = \frac{1}{N_m} \sum_{x_i \in R_m(j, s)} y_i, \quad x \in R_m, \quad m = 1, 2 \quad (\text{S4})$$

Where,  $j$  represents the optimal partition feature,  $s$  denotes the optimal partition sample point under the optimal partition feature,  $x_i$  is the sample point,  $y_i$  is the output value corresponding to the sample point,  $\hat{C}_m$  stands for the output value of the subtree, and  $N_m$  refers to the total number of features contained in the subtree.

(3) The prediction result of each regression tree is the mean value of leaf nodes reached by the sample point, as shown in Eqs. (S5) and (S6).

(4) The final prediction result of random forest is the unweighted mean value of all

regression tree prediction results, as shown in Eq. (S7).

$$h_s(x) = \sum_{m=1}^M \hat{c}_m I(x \in R_m) \quad (\text{S5})$$

$$I = \begin{cases} 1 & \text{if } (x \in R_m) \\ 0 & \text{if } (x \notin R_m) \end{cases} \quad (\text{S6})$$

$$\bar{h}(x) = \frac{1}{S} \sum_{s=1}^S h_s(x) \quad (\text{S7})$$

Where  $I$  is the indicator function,  $h_s(x)$  refers to the predicted result of each tree,  $\bar{h}(x)$  stands for the final prediction result of random forest, and  $S$  denotes the number of regression trees.

## A.2 Support vector regression algorithm

For a linear regression, the objective is to fit a regression line ( $\hat{y} = W^T x + b$ ) for the data to minimize the error caused by the deviation. The process usually uses the least square method to determine the vector  $W$  and offset term  $b$ . The support vector regression model will set a threshold ( $\mathcal{E}$ , function interval) around the regression line. The point within the threshold will not be punished due to its error (no loss will be calculated). Only the support vector will have an impact on its functional model. Such a threshold area is commonly known as the  $\mathcal{E}$ -pipeline.

SVR maps the original space of the input data to a higher dimensional feature space through the kernel function, making the problem of nonlinear regression become a problem of approximate linear regression after the transformation of the kernel function. The common kernel functions of the SVR model are shown in Table S1.

In the feature space, to determine the optimal linear plane of fitting data, the optimized SVR model is obtained by minimizing the total loss and maximizing the pipe width ( $\frac{\mathcal{E}}{\|W\|}$ ), as shown in Eq. (S8). Since the error of the predicted value of each training data is at most equal to  $\mathcal{E}$ , the smoothest function ( $f(x)$ ) is found by

minimizing the vector norm ( $\|W\|^2$ ). The objective function and constraints are given in Eqs. (S9) and (S10).

$$\text{The smoothest function of SVR model: } f(x) = W^T \phi(x) + b \quad (\text{S8})$$

$$\text{The objective function of SVR model: } \min_{W, b} \frac{1}{2} \|W\|^2 \quad (\text{S9})$$

$$\text{The constraints of SVR model: } \|y_i - [W \phi(x_i) + b]\| \leq \varepsilon \quad (\text{S10})$$

where  $W$  is the weight,  $b$  is the deviation,  $\phi(x)$  represents the mapping of feature  $x$  from low to high dimensions.

### A.3 Neural network algorithm

Neural network algorithm is an information processing system that simulates the neural results of human brain to realize the intelligent activities of human brain. Its structure mainly includes input layer, hidden layer and output layer, and each layer is connected by the most basic element neuron. In the artificial neural network, each neuron receives the input signals ( $x_0, x_1, \dots, x_n$ ) transmitted from the upper layer of neurons and superposes with the weight ( $w_i$ ). It is then to set a threshold ( $b$ ) to ensure that the output value calculated through the input cannot be randomly activated, and finally output them through the activation function.

$$\text{For a neuron: } y = f_{act} \left( \sum_{i=1}^n w_i x_i + b \right) \quad (\text{S11})$$

Where  $f_{act}$  is the activation function;  $x_i$  denotes the input of a neuron at the upper level; and  $y$  represents the output of the neuron.

From each layer of the neural network, the result is composed of the output of all neurons in this layer, as shown in Eq. (S12).

$$h_{out}^{(i)} = f_{act}^{(i)} (h_{in}^{(i)} w^{(i)} + b^{(i)}) \quad (\text{S12})$$

Where  $h_{in}$  is the output matrix of the upper layer, and its dimension is  $[N, D_{in}]$ ;  $h_{out}$  is the output matrix of this layer whose dimension is  $[N, D_{out}]$ ;  $w^{(i)}$  is the weight matrix whose dimension is  $[D_{in}, D_{out}]$ ;  $b^{(i)}$  is the offset matrix whose dimension is  $[1, D_{out}]$ ;

$f_{act}^{(i)}$  denotes the activation function;  $N$  is the number of samples in the matrix;  $D_{in}$  represents the input sample dimension, and  $D_{out}$  represents the output sample dimension.

This paper introduces a back-propagation algorithm, which is a supervised learning method. It is constantly updated  $W$  and  $b$  through "learning from mistakes" to minimize the difference (loss function) between the final model output and the true value. Here, the gradient descent algorithm is the most commonly used optimization method for updating  $W$  and  $b$ . Then, a trained neural network is obtained by repeating the above process for the whole training set. Finally, to output the test set, it can get the prediction value through forward propagation to evaluate the prediction results of the trained neural network on the unknown data set.

## Appendix B Supplementary figures and tables

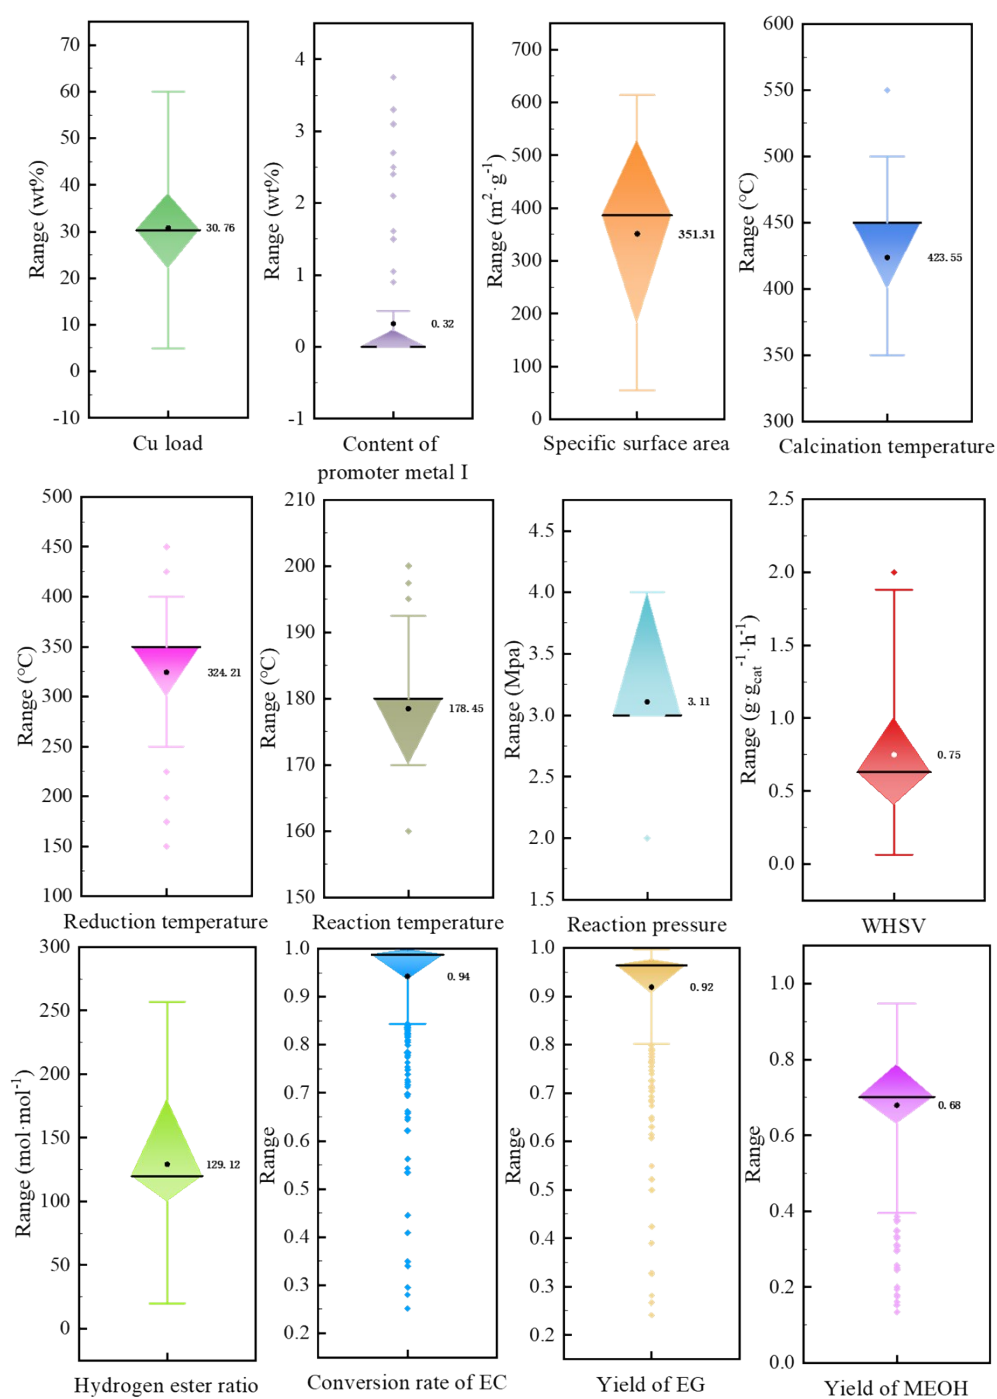

**Fig. S1.** Data frequency(distribution) analysis of the collected indirect CO<sub>2</sub> hydrogenation catalysts

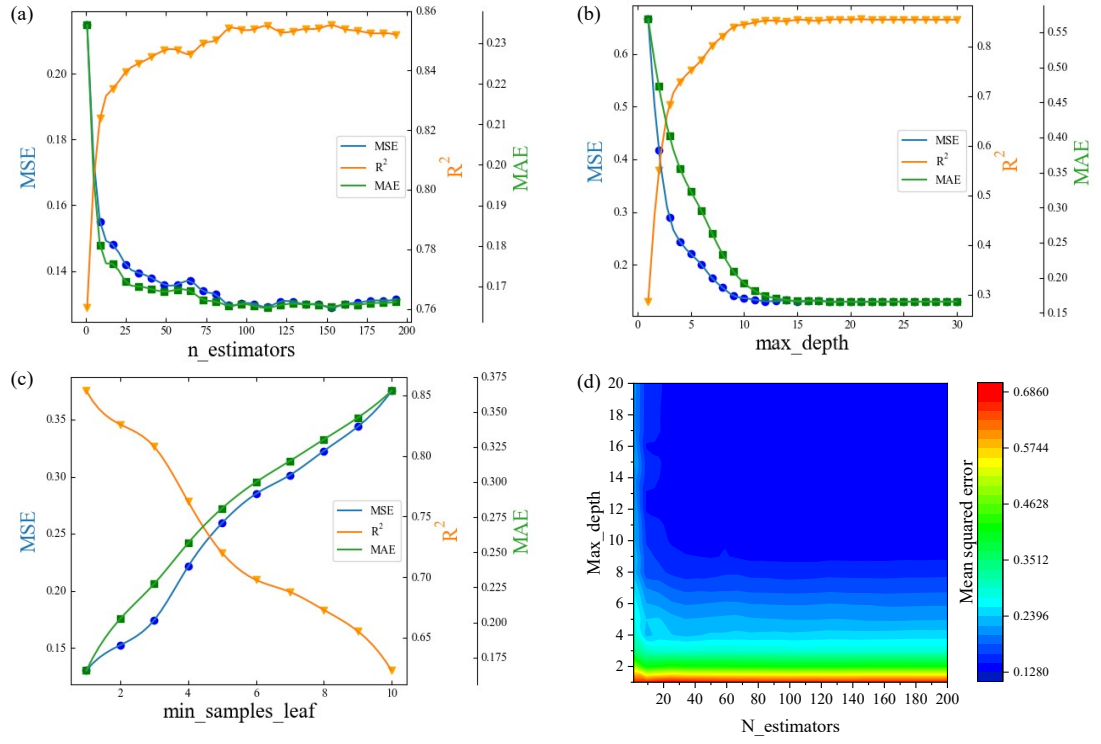

**Fig. S2.** Optimization of the hyperparameters of the RFR model under 5-fold

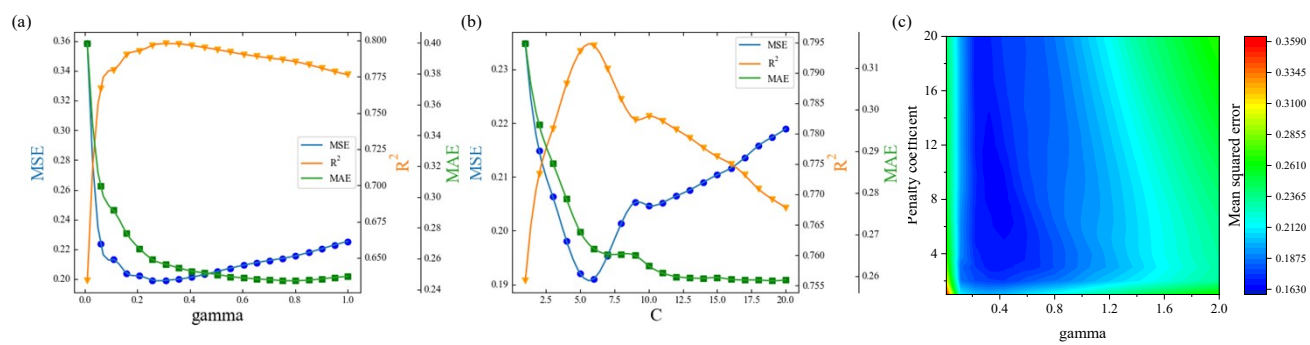

**Fig. S3.** Optimization of the hyperparameters of the SVR model under 5-fold cross-validation



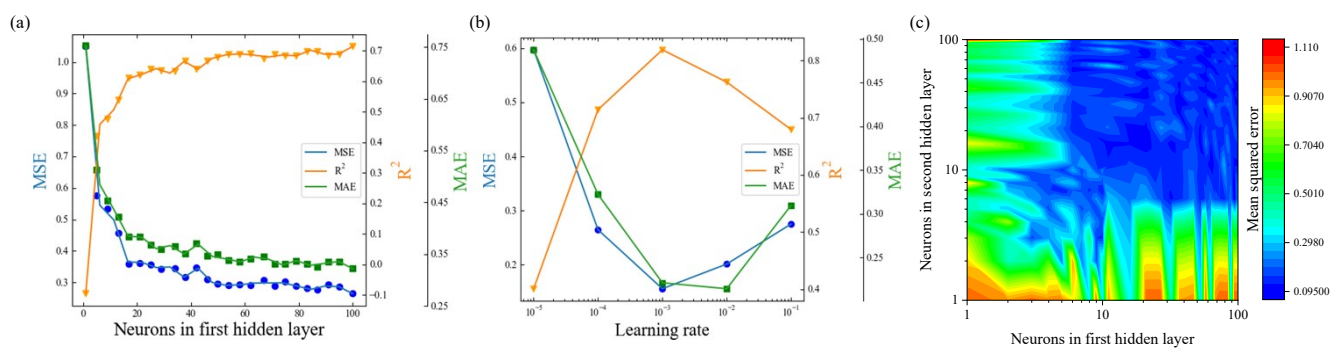

**Fig. S4.** Optimization of the hyperparameters of the NN model under 5-fold cross-validation

## Appendix C Code of the PCA, SHAP, and GA optimization methods

### Appendix C.1 Code of the PCA method

```
30 # data standardization
31 data = df.values.astype(np.float32)
32 data = shuffle(data, random_state=2022)
33 scaler = StandardScaler()
34 data = scaler.fit_transform(data)
35
36 # Mean and variance of data
37 data_mean = np.mean(data, axis = 0)
38 data_std = np.std(data, axis = 0)
39
40 # covariance matrix
41 cov_mat = (data - data_mean).T.dot((data - data_mean))/(data.shape[0]-1)
42
43 # PCA
44 ew, ev = np.linalg.eig(cov_mat) #ew—eigenvalue, ev—Eigenvector
45 ew_order = np.argsort(ew)[::-1] #Arrange from large to small
46 ew_sort = ew[ew_order]
47 ev_sort = ev[:, ew_order]
48
49 # Each principal component contribution
50 gx = ew_sort/np.sum(ew_sort)
51
52 # Accumulated contribution
53 lgx = np.cumsum(gx)
54
55 # Draw principal component variance diagram
56 x1 = np.linspace(1, 26, 26)
57 x2 = x1 + 0.5
58 y1 = gx
59 y2 = lgx
60 plt.bar(x=x1, height=y1, width=0.9, label="Individual explained variance", color="teal", alpha=0.8)
61 plt.step(x2, y2, label="Cumulative explained variance", color="teal", alpha=0.8)
62
63 # Set x-axis scale
64 xticks(np.linspace(1, 26, 26, endpoint=True))
65
66 # Set Title
67 # plt.title("Principal component variance")
68
69 # Set coordinate axis
70 plt.xticks(fontsize=12)
```

Fig. S5. Key code of the PCA method

## Appendix C.2 Code of the SHAP method

```
270 # SHAP Value Interpretation Machine Learning Model
271 x_train = pd.DataFrame(x_train)
272 x_train.columns=['Catalyst','Cu (wt.%)','Promoter I','Promoter I (wt.%)','Promoter II','Promoter II (wt.%)','Support','Preparation'
273 x_test = pd.DataFrame(x_test)
274 x_test.columns=['Catalyst','Cu (wt.%)','Promoter I','Promoter I (wt.%)','Promoter II','Promoter II (wt.%)','Support','Preparation'
275 explainer = shap.KernelExplainer(regr.predict, x_train)
276 shap_values = explainer.shap_values(x_test)# 传入特征矩阵, 计算SHAP值
277
278 # SHAP value of EC conversion
279 shap_values_EC = shap_values[0]
280 shap_sum_EC = np.sum(abs(shap_values_EC), axis=0)
281 shap_sum_EC = pd.DataFrame(shap_sum_EC)
282 shap_sum_EC.index = ['Catalyst type','Cu load','Promoter I','Content of\npromoter metal I','Promoter II','Content of\npromoter metal II']
283
284 # SHAP value of EG yield
285 shap_values_EG = shap_values[1]
286 shap_sum_EG = np.sum(abs(shap_values_EG), axis=0)
287 shap_sum_EG = pd.DataFrame(shap_sum_EG)
288 shap_sum_EG.index = ['Catalyst type','Cu load','Promoter I','Content of\npromoter metal I','Promoter II','Content of\npromoter metal II']
289
290 # SHAP value of MEOH yield
291 shap_values_MEOH = shap_values[2]
292 shap_sum_MEOH = np.sum(abs(shap_values_MEOH), axis=0)
293 shap_sum_MEOH = pd.DataFrame(shap_sum_MEOH)
294 shap_sum_MEOH.index = ['Catalyst type','Cu load','Promoter I','Content of\npromoter metal I','Promoter II','Content of\npromoter metal II']
295
296 # EC feature importance ranking
297 shap.summary_plot([shap_values_EC,shap_values_EG,shap_values_MEOH], x_test, plot_type="bar", class_inds=[0,1,2], class_names=['EC conversion', 'EG yield', 'MEOH yield'])
298 font = {'family':'Times New Roman', 'weight':'normal', 'size':14}
299 plt.xlabel("mean(|Shap value|)(average impact on model output magnitude)", fontdict=font)
300 plt.title("Importance ranking of input features in machine learning model", fontsize=16)
301 plt.legend()
302 plt.figure(figsize=(16,16))
303 plt.show()
304
305 shap.summary_plot(shap_values_EC, x_test, plot_type="bar", color='darkcyan', show=False)
306 font = {'family':'Times New Roman', 'weight':'normal', 'size':16}
307 plt.xlabel("mean(|Shap value|)(average impact on model output magnitude)", fontdict=font)
308 plt.title("The Importance Ranking of Input Features of\nMachine Learning Model for EC Conversion", fontsize=18)
309 plt.figure(figsize=(16,16))
310 plt.show()
```

Fig. S6. Key code of the SHAP interpreter

How to explain the built machine learning model by importing the corresponding SHAP package is detailed in: <https://Welcome to the SHAP documentation — SHAP latest documentation>.

## Appendix C.3 Code of the GA optimization method

```

359 class MyProblem(ea.Problem):
360     def __init__(self):
361         name = 'MyProblem'
362         M = 1 # Initialize M (target dimension)
363         maxormins = [-1] # Initialize maxormins (target minimizing and maximizing tag list, 1: minimize target; -1: maximize target)
364         Dim = 16 # Initialize Dim (decision variable dimension)
365         varTypes = [1, 0, 1, 0, 1, 0, 1, 1, 0, 1, 1, 1, 0, 1, 1] # Initialize varTypes (the type of decision variable, 1: continuous; 0: discrete)
366         lb = [17, 40, 6, 0.12, 0, 0, 4, 1, 518, 350, 350, 180, 3, 1, 45, 0] # Lower bound of decision variables
367         ub = [17, 41.9, 6, 0.48, 0, 0, 4, 1, 578, 350, 350, 180, 3, 1, 180, 0] # Upper bound of decision variables
368         lbin = [1] * Dim # The lower boundary of the decision variable, where 1 represents the boundary of the inclusion
369         ubin = [1] * Dim # The upper boundary of the decision variable, where 1 represents the boundary of the inclusion
370         # Instantiate
371         ea.Problem.__init__(self, name, M, maxormins, Dim, varTypes, lb, ub, lbin, ubin)
372
373     def aimFunc(self, pop): # objective function
374         Vars = pop.Phen # Obtain the decision variable matrix
375         # print(pop.Phen.size)
376         y_Phen = np.zeros((40, 3))
377         pop.Phen1 = np.hstack([pop.Phen[:, 0:16], y_Phen])
378         pop.Phen1 = pop.Phen1.astype(np.float32)
379         pop.Phen1 = scaler.transform(pop.Phen1)
380         p_Phen = regr.predict(pop.Phen1[:, 0:16])
381         p_data = np.hstack([pop.Phen1[:, 0:16], p_Phen])
382         p_ks = p_data[:, 13].reshape(-1, 1)
383         p_qzb = p_data[:, 14].reshape(-1, 1)
384         p_EG = p_data[:, 17].reshape(-1, 1)
385         p_MEOH = p_data[:, 18].reshape(-1, 1)
386         p_data = scaler.inverse_transform(p_data)
387         EC_p = p_data[:, 16].reshape(-1, 1)
388         EG_p = p_data[:, 17].reshape(-1, 1)
389         MEOH_p = p_data[:, 18].reshape(-1, 1)
390         pop.CV = np.hstack([EC_p - 1, EG_p - 1, MEOH_p - 1])
391         pop.ObjV = 0.25 * p_MEOH + 0.25 * p_EG + 0.25 * p_ks - 0.25 * p_qzb # Calculate the objective function value and control variable value
392
393 # Instantiate the problem object
394 problem = MyProblem()
395
396 # Population settings
397 Encoding = 'RI' # Encoding method
398 NIND = 40 # population size
399 Field = ea.crtfld(Encoding, problem.varTypes, problem.ranges, problem.borders)
400 population = ea.Population(Encoding, Field, NIND) # Instantiating a population object (at this point, the population has been initialized)
401
402 # Constructive Algorithms
403 myAlgorithm = ea.soea_DE_rand_1_L_templet(problem, population) # Instantiating an Algorithm Template Object
404 myAlgorithm.MAXGEN = 1000 # Maximum Generation
405 myAlgorithm.mutOper.F = 0.5 # Parameter F in Differential Evolution
406 myAlgorithm.recOper.XOVR = 0.7 # Set crossover probability
407 myAlgorithm.logTras = 1 # Set how many generations to record logs every, if set to 0, it means no logs will be recorded
408 myAlgorithm.verbose = True # Set whether to print out log information
409 myAlgorithm.drawing = 1 # Set drawing method (0: No drawing; 1: Draw result graph; 2: Animate target space process; 3: Animate target space process)
410
411 # Calling algorithm templates for population evolution
412 [BestIndi, population] = myAlgorithm.run() # Execute the algorithm template to obtain the optimal individual and the last population
413
414 # Output Results
415 print('Number of evaluations: %s' % myAlgorithm.evalsNum)
416 print('Time spent %s 秒' % myAlgorithm.passTime)
417 if BestIndi.sizes != 0:
418     print('The optimal objective function value is: %s' % BestIndi.ObjV[0][0])
419     print('Optimal control variable value: ')
420     for i in range(BestIndi.Phen.shape[1]):
421         print(BestIndi.Phen[0, i])
422 else:
423     print('No feasible solution was found this time.')

```

**Fig. S7.** Key code of the GA optimization method

Using the Geatpy genetic algorithm template to optimize and screen catalyst parameters is detailed in:

<https://geatpy.com/> – The Genetic and Evolutionary Algorithm Toolbox for Python with High Performance.

**Table S1** Common kernel functions and parameters of the SVR model

| Function              | Expression                                               | Parameters                |
|-----------------------|----------------------------------------------------------|---------------------------|
| Linear Kernel         | $k(x_i, x_j) = (x_i, x_j)$                               | /                         |
| Polynomial Kernel     | $k(x_i, x_j) = ((x_i, x_j) + 1)^d$                       | $d \geq 1$                |
| Gaussian Kernel (RBF) | $k(x_i, x_j) = \exp(-\frac{\ x_i - x_j\ ^2}{2\sigma^2})$ | $\sigma > 0$              |
| Laplacian Kernel      | $k(x_i, x_j) = \exp(-\frac{\ x_i - x_j\ }{\sigma})$      | $\sigma > 0$              |
| Sigmoid Kernel        | $k(x_i, x_j) = \tanh(\lambda(x_i, x_j) + \theta)$        | $\lambda > 0, \theta < 0$ |

**Table S2** Main information of the original dataset

| Features | Type                   | Item                         | Unit                                                            |
|----------|------------------------|------------------------------|-----------------------------------------------------------------|
| Input    | Catalyst Descriptor    | Catalyst type                | /                                                               |
|          |                        | Cu load                      | wt%                                                             |
|          |                        | Content of promoter metal I  | wt%                                                             |
|          |                        | Content of promoter metal II | wt%                                                             |
|          | Preparation conditions | Calcination temperature      | °C                                                              |
|          |                        | reduction temperature        | °C                                                              |
|          | Operating conditions   | Reaction temperature         | °C                                                              |
|          |                        | Reaction pressure            | MPa                                                             |
|          |                        | Weight hourly space velocity | $\text{g} \cdot \text{g}_{\text{cat}}^{-1} \cdot \text{h}^{-1}$ |
| Output   | Feeding conditions     | Hydrogen ester ration        | $\text{mol} \cdot \text{mol}^{-1}$                              |
|          |                        | Solvent type                 | /                                                               |
|          | Conversion             | Conversion rate of EC        | /                                                               |
|          | Yield                  | Yield of EG                  | /                                                               |
|          |                        | Yield of MEOH                | /                                                               |

**Table S3** Main information of the dataset improved by PCA

| Features | Type                   | Item                                   | Unit                                              |
|----------|------------------------|----------------------------------------|---------------------------------------------------|
| Input    | Catalyst Descriptor    | Catalyst type                          | /                                                 |
|          |                        | Cu load                                | wt%                                               |
|          |                        | Atomic weight of promoter metal I      | /                                                 |
|          |                        | Radius of promoter atomic (ion) I      | /                                                 |
|          |                        | Electronegativity of promoter metal I  | /                                                 |
|          |                        | Status of promoter metal I             | /                                                 |
|          |                        | Content of promoter metal I            | wt%                                               |
|          |                        | Atomic weight of promoter metal II     | /                                                 |
|          |                        | Radius of promoter atomic (ion) II     | /                                                 |
|          |                        | Electronegativity of promoter metal II | /                                                 |
|          |                        | Status of promoter metal II            | /                                                 |
|          |                        | Content of promoter metal II           | wt%                                               |
|          |                        | Support type                           | /                                                 |
|          |                        | Preparation method                     | /                                                 |
|          |                        | Specific surface area                  | m <sup>2</sup> /g                                 |
|          |                        | Pore volume                            | cm <sup>3</sup> /g                                |
|          | Preparation conditions | Calcination temperature                | °C                                                |
|          |                        | reduction temperature                  | °C                                                |
|          | Operating conditions   | Reaction temperature                   | °C                                                |
|          |                        | Reaction pressure                      | MPa                                               |
|          |                        | Weight hourly space velocity           | g·g <sub>cat</sub> <sup>-1</sup> ·h <sup>-1</sup> |
|          | Feeding conditions     | Hydrogen ester ration                  | mol·mol <sup>-1</sup>                             |
|          |                        | Solvent type                           | /                                                 |
| Output   | Conversion             | Conversion rate of EC                  | /                                                 |
|          | Yield                  | Yield of EG                            | /                                                 |
|          |                        | Yield of MEOH                          | /                                                 |

**Table S4** Definition of the optimized hyperparameters of the established ML models

| ML model | Hyperparameters  | Definition                                                     |
|----------|------------------|----------------------------------------------------------------|
| RFR      | n_estimators     | Number of decision trees                                       |
|          | max_features     | Maximum depth of tree                                          |
|          | min_samples_leaf | Minimum samples contained in leaf nodes                        |
| SVR      | kernel           | Functions that map samples to higher dimensions                |
|          | gamma            | Coefficients in kernel functions                               |
|          | C                | Penalty coefficient (regularization coefficient)               |
| NN       | Neuron           | Basic Unit of neural network                                   |
|          | learning rate    | Tuning parameters to determine the step size in each iteration |

**Table S5** Evaluation of the SVR model with different kernel functions by 5-fold cross-validated average MSE, R<sup>2</sup>, and MAE

| Kernel function       | MSE    | R <sup>2</sup> | MAE    |
|-----------------------|--------|----------------|--------|
| Linear Kernel         | 0.4493 | 0.5280         | 0.4371 |
| Polynomial Kernel     | 0.2827 | 0.7037         | 0.3387 |
| Gaussian Kernel (RBF) | 0.2347 | 0.7559         | 0.3158 |
| Sigmoid Kernel        | 1.0355 | -0.076         | 0.7017 |



| Table S6                                 |                                                                     |             |                              |                          |                    |                       | Supplementary              |
|------------------------------------------|---------------------------------------------------------------------|-------------|------------------------------|--------------------------|--------------------|-----------------------|----------------------------|
| results of optimized<br>various types of | Catalysts                                                           | Promoter II | Content of promoter metal II | Support type             | Preparation method | Specific surface area | parameters of<br>catalysts |
|                                          | Cu/SiO <sub>2</sub>                                                 | None        | 0                            | SiO <sub>2</sub>         | AE                 | 489                   |                            |
|                                          | Cu/HMS                                                              | None        | 0                            | HMS                      | AE                 | 225.49                |                            |
|                                          | Cu/SiO <sub>2</sub> -S                                              | None        | 0                            | SiO <sub>2</sub> -S      | AE                 | 55                    |                            |
|                                          | Cu-C/SiO <sub>2</sub> -R                                            | None        | 0                            | SiO <sub>2</sub> -C      | AE                 | 201.3                 |                            |
|                                          | Cu-MgO/SBA-15                                                       | None        | 0                            | SBA-15                   | AE                 | 429.17                |                            |
|                                          | Ni-Cu/SiO <sub>2</sub>                                              | None        | 0                            | SiO <sub>2</sub>         | AE                 | 613.53                |                            |
|                                          | Cu/SiO <sub>2</sub> -F                                              | None        | 0                            | SiO <sub>2</sub> -F-3.75 | OSHP               | 112                   |                            |
|                                          | Cu <sub>8</sub> -Mg <sub>1</sub> -Zr <sub>2</sub> /SiO <sub>2</sub> | Zr          | 4.2                          | SiO <sub>2</sub>         | DP                 | 82                    |                            |
|                                          | Cu <sub>x</sub> -Mg <sub>1</sub> /SiO <sub>2</sub>                  | None        | 0                            | SiO <sub>2</sub>         | DP                 | 56                    |                            |
|                                          | S-1-210@CuSiO <sub>3</sub>                                          | None        | 0                            | S-1-210                  | OSHT               | 363                   |                            |
|                                          | xMo-Cu/SiO <sub>2</sub>                                             | None        | 0                            | SiO <sub>2</sub>         | AE-IWI             | 448                   |                            |
|                                          | xMoO <sub>x</sub> -Cu/SiO <sub>2</sub>                              | None        | 0                            | SiO <sub>2</sub>         | OPMHT              | 413                   |                            |
|                                          | xPt-Cu/SiO <sub>2</sub>                                             | None        | 0                            | SiO <sub>2</sub>         | AE-IWI             | 578                   |                            |
